---

## Correction

*Control of mRNA degradation in trypanosomes*

By Christine Clayton, Angela Schwede, Mhairi Stewart, Ana Robles, Corinna Benz, June Po, Martin Wurst, Rafael Queiroz and Stuart Archer

Volume 36 Part 3 (2008) 520–521

Unfortunately, Rafael Queiroz's name was inadvertently spelt incorrectly throughout this paper. It is spelt correctly here.
